# Supplementary material
Source: PubMed Central journal article supplement (PMC4537776)

Fig. S4

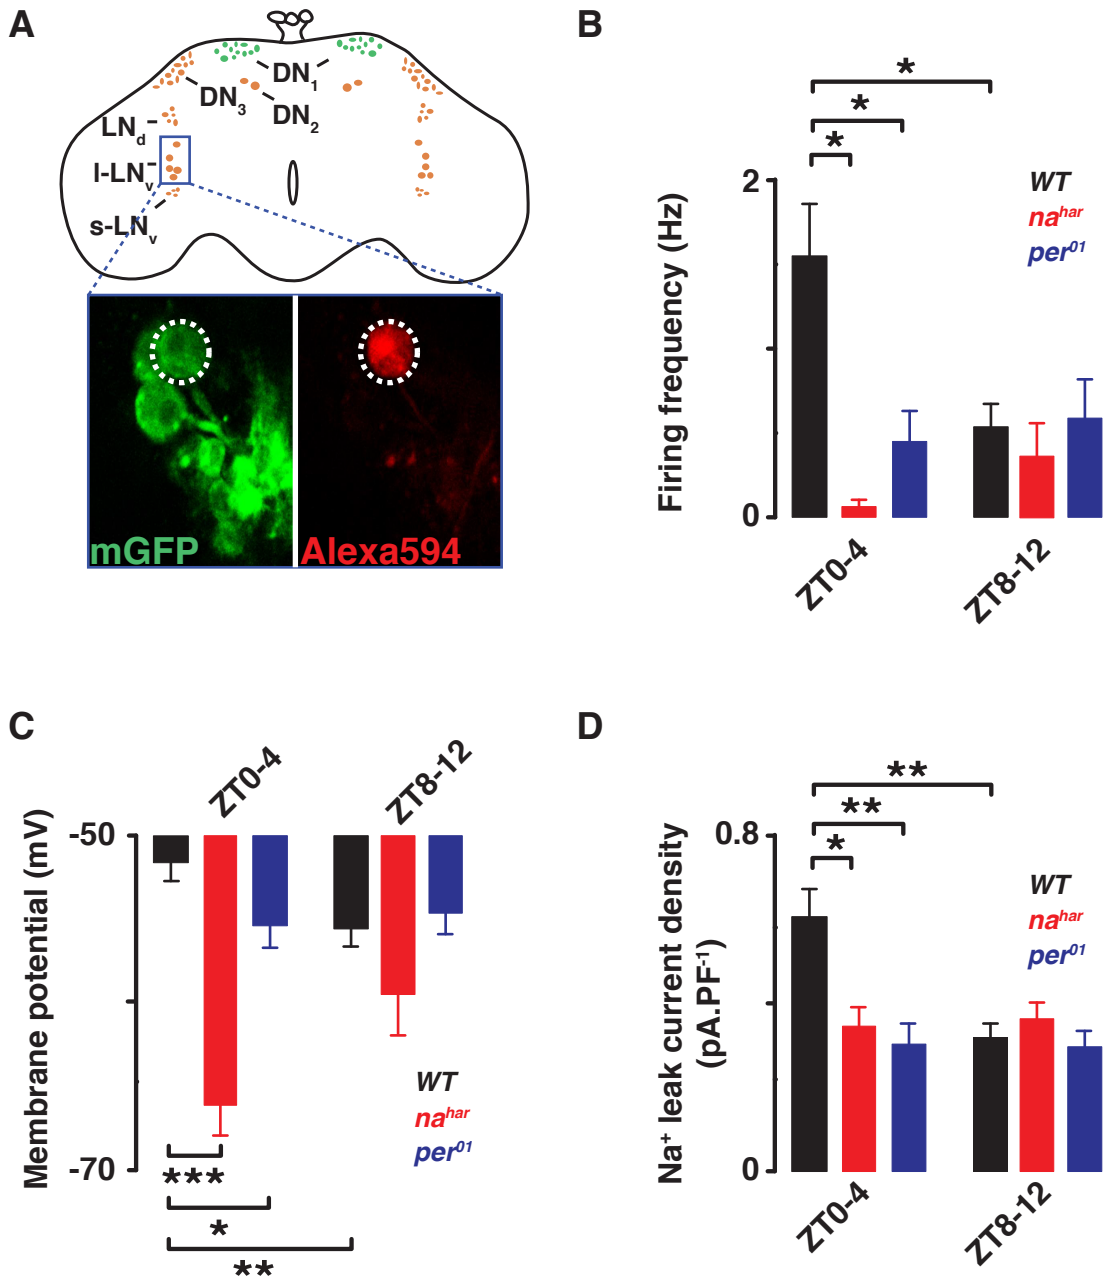

Supplement: NIHMS710425-supplement-1.pdf [file NIHMS710425-supplement-1.pdf]

Fig. S1

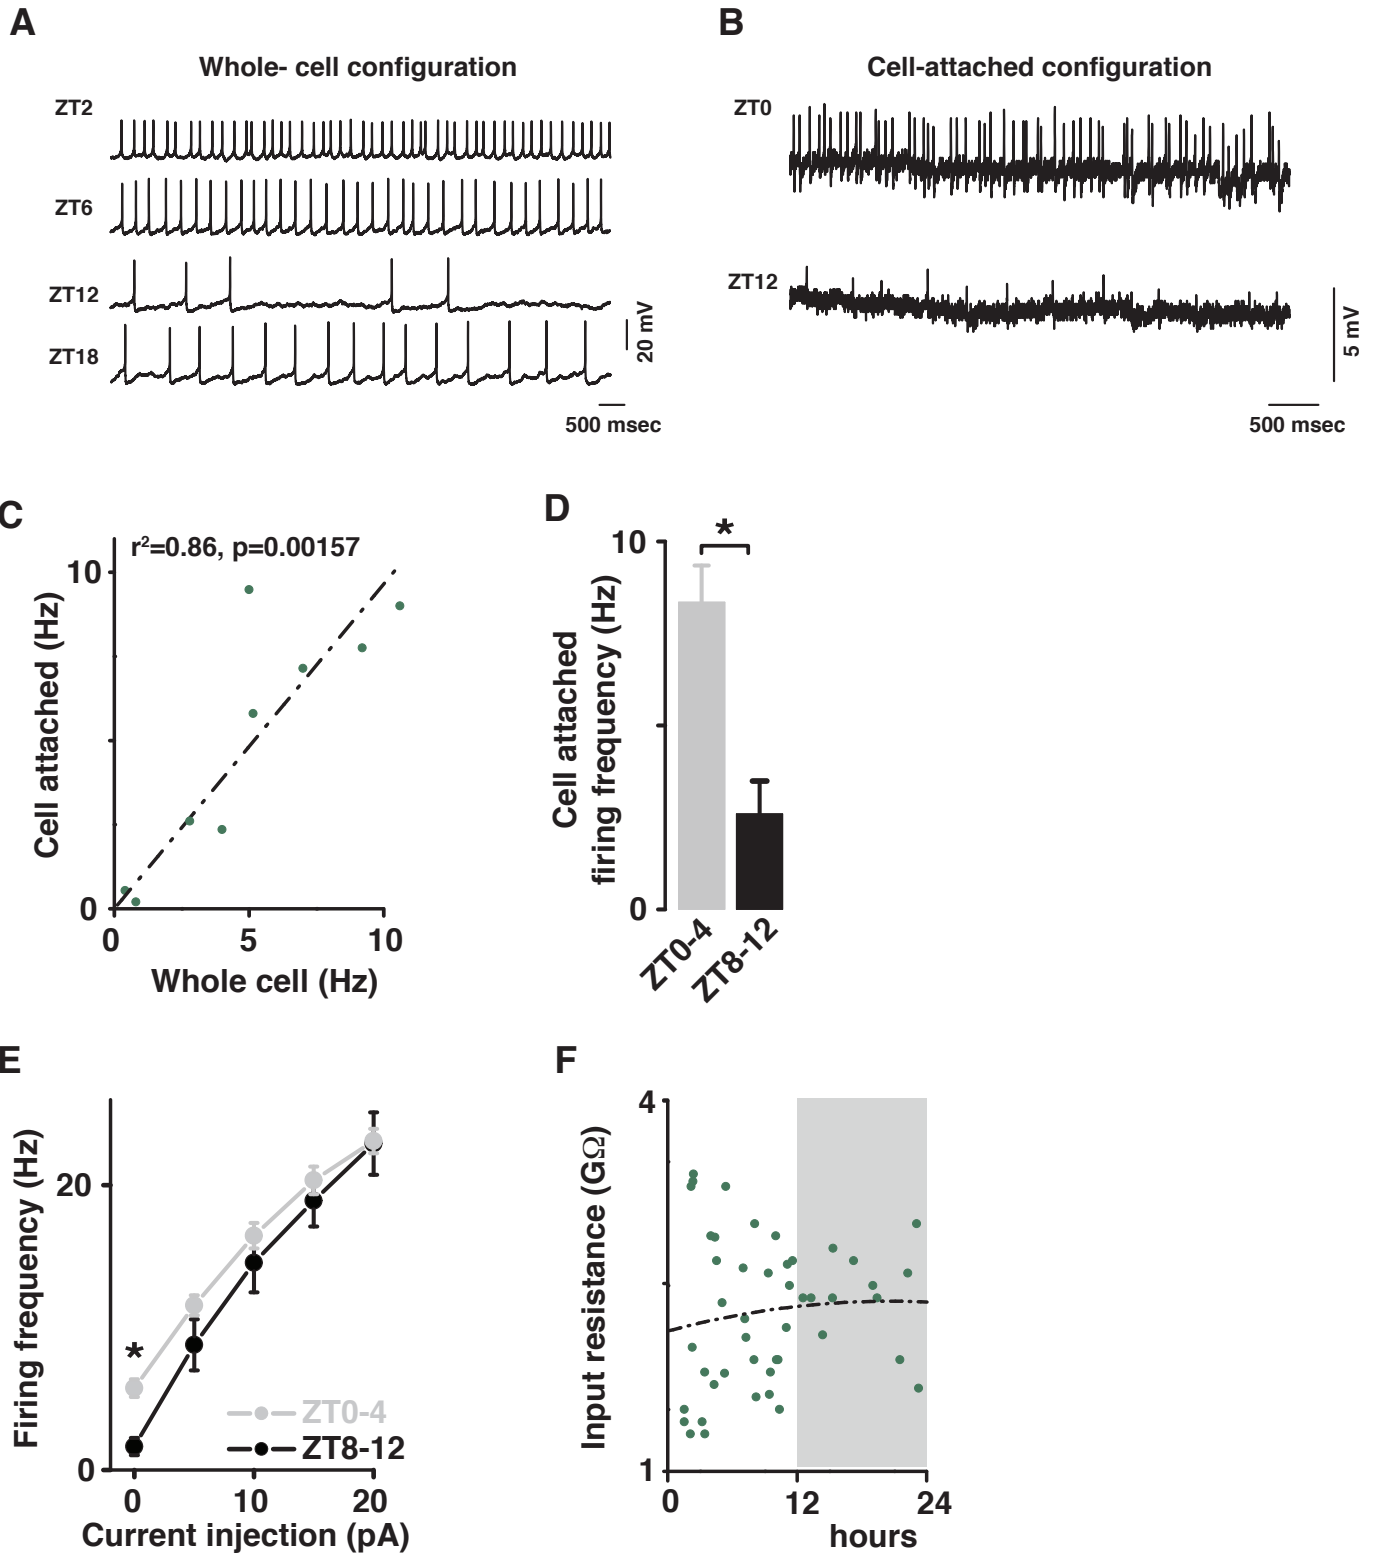

Supplement: NIHMS710425-supplement-2.pdf [file NIHMS710425-supplement-2.pdf]

Fig. S2

A

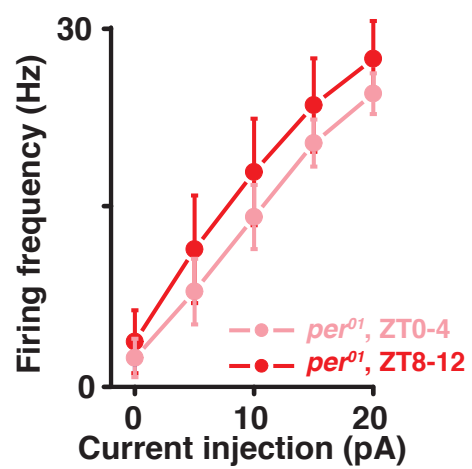

B

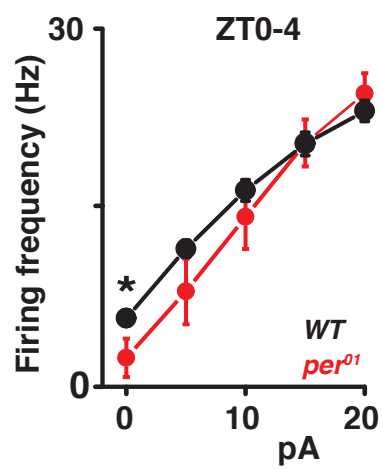

Supplement: NIHMS710425-supplement-3.pdf [file NIHMS710425-supplement-3.pdf]

Fig. S3

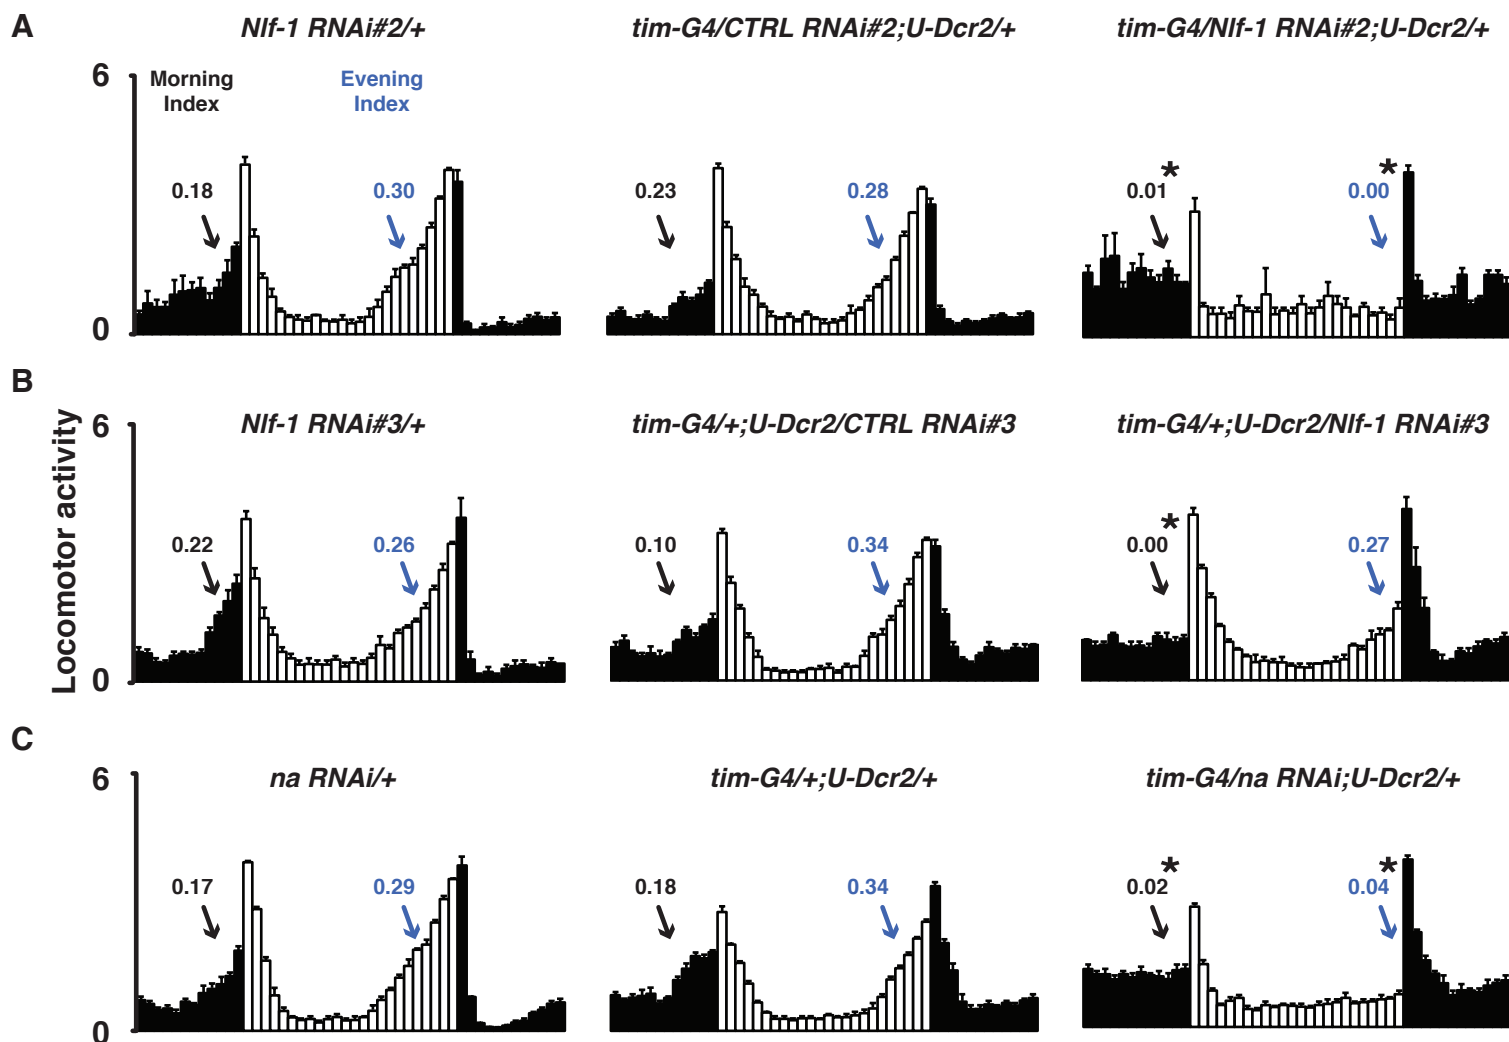

Supplement: NIHMS710425-supplement-4.pdf [file NIHMS710425-supplement-4.pdf]

Fig. S5

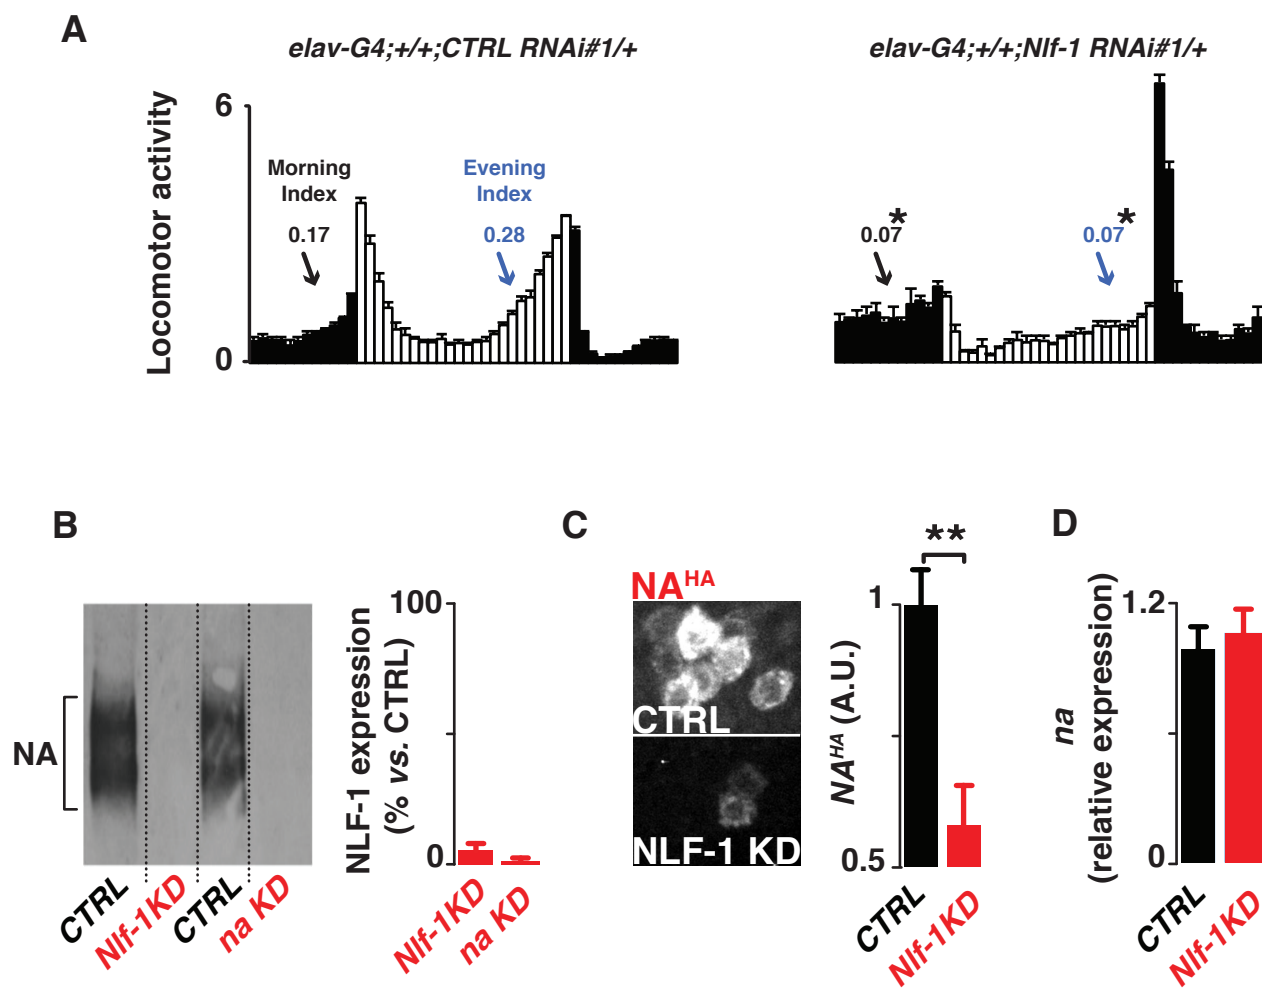

Supplement: NIHMS710425-supplement-5.pdf [file NIHMS710425-supplement-5.pdf]

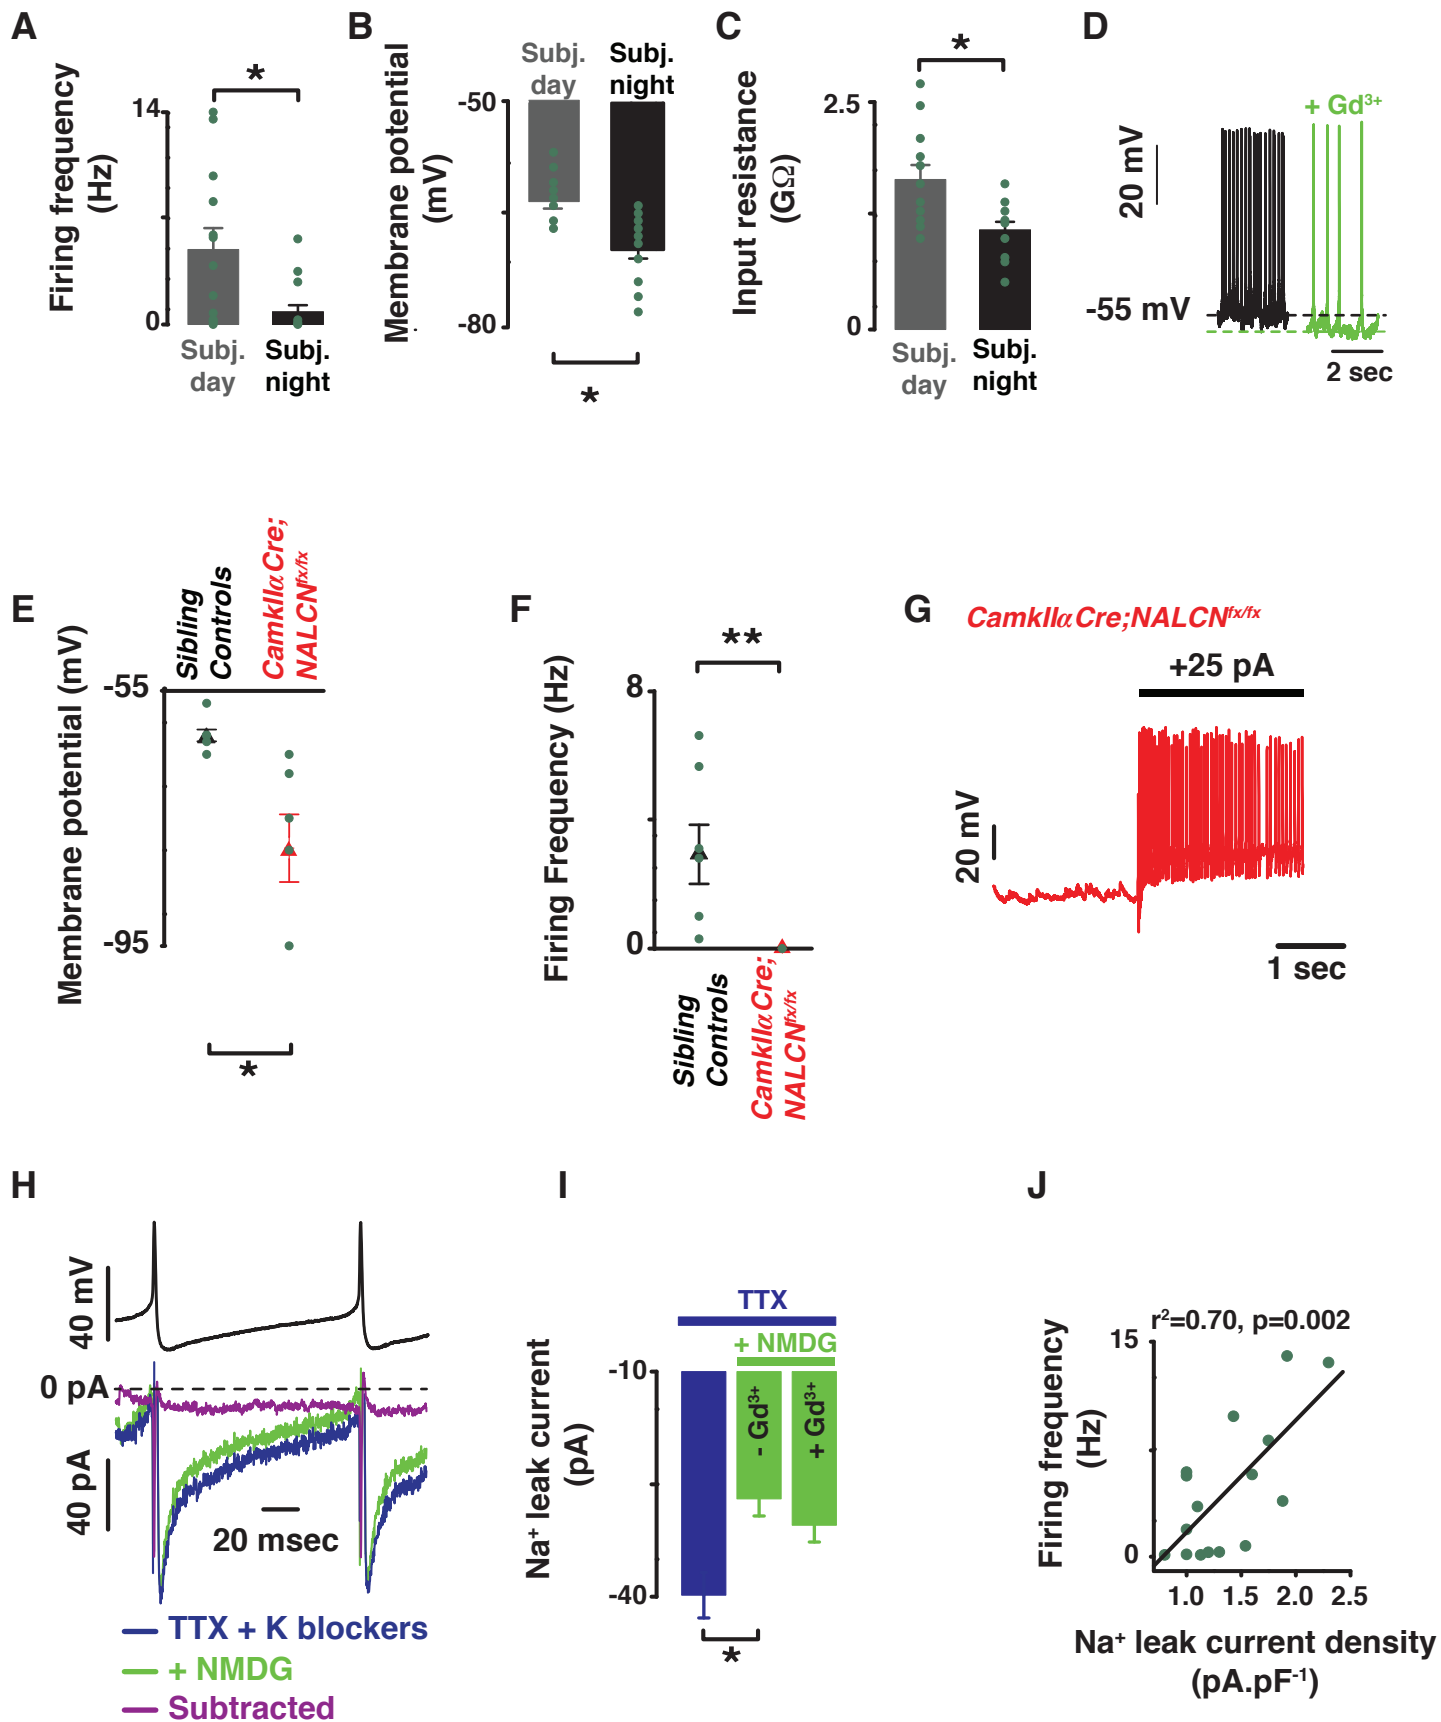

Supplement: NIHMS710425-supplement-6.pdf [file NIHMS710425-supplement-6.pdf]

Fig. S7

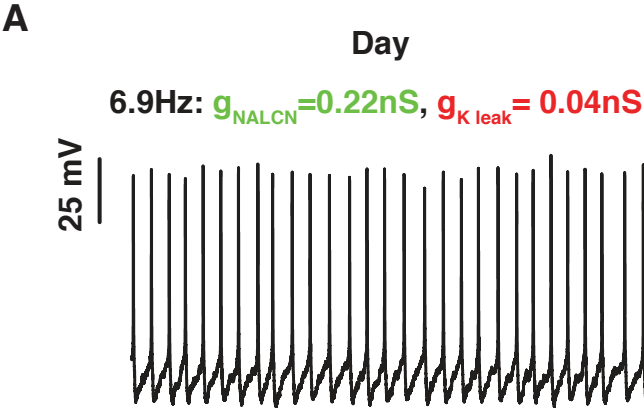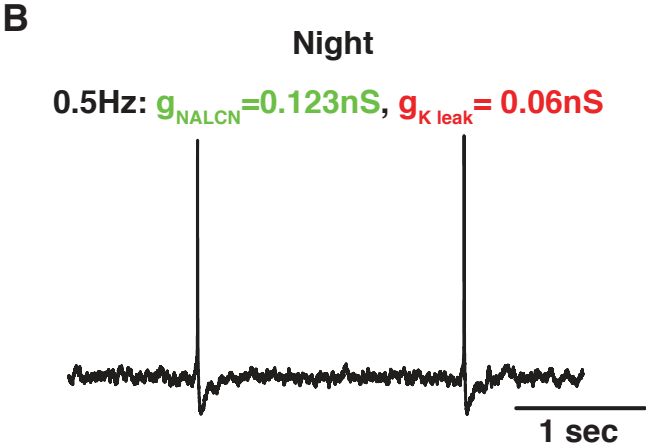

Supplement: NIHMS710425-supplement-7.pdf [file NIHMS710425-supplement-7.pdf]
